# Supplementary material for: Revisit of the Photoirradiation of α-Lipoic Acid—Role of Hydrogen Sulfide Produced in the Reaction
Source: MDPI journal article supplement (doi:10.3390/biochem1030012), 2021-10-02
Supplement: s1 [file s1]

(A)  $^1\text{H}$ -NMR ( $\text{D}_2\text{O}$ )

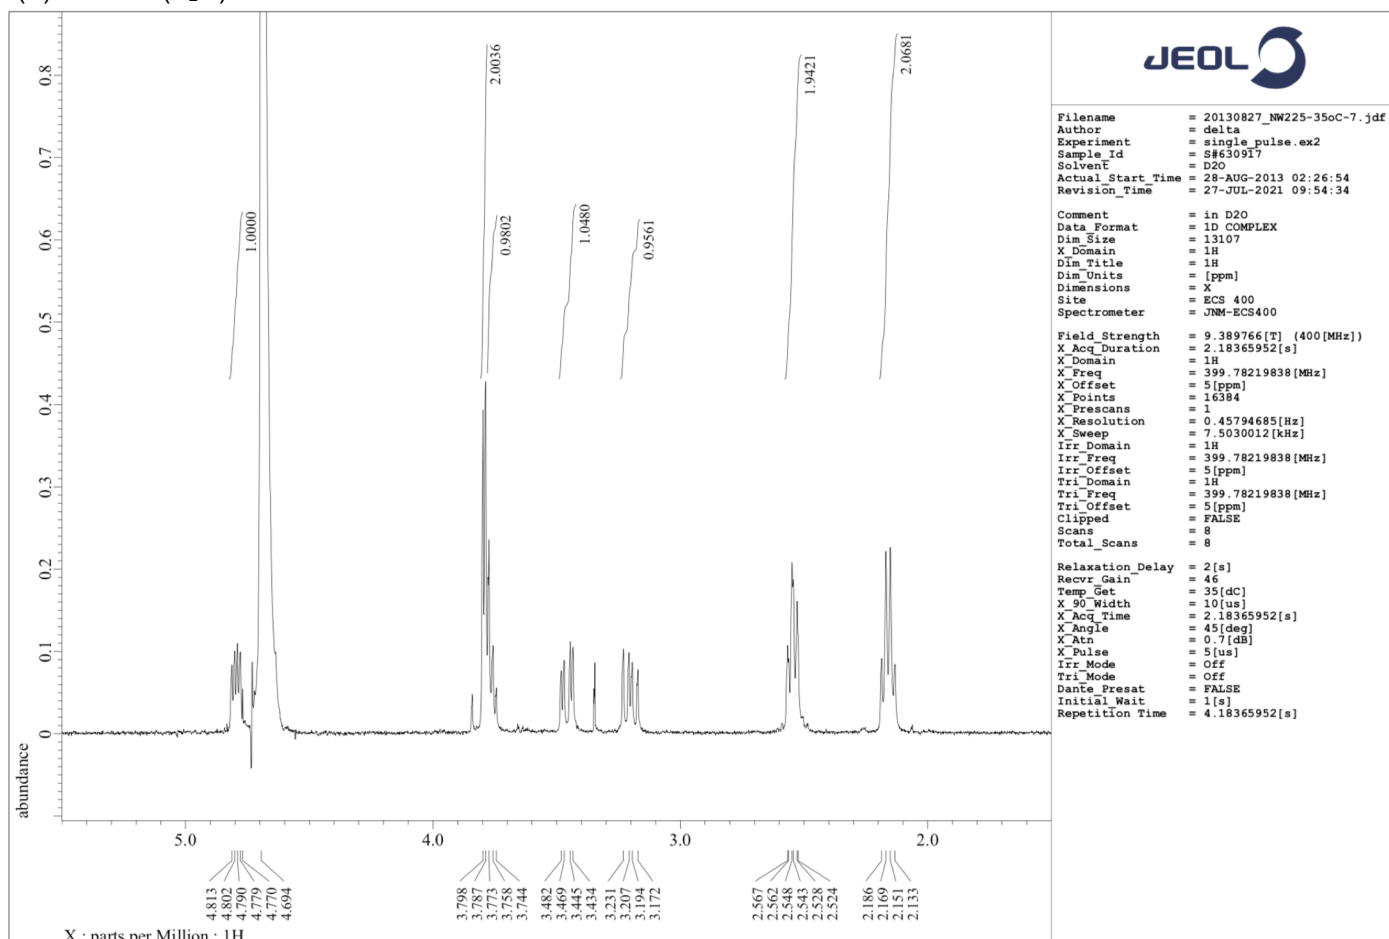

(B)  $^{13}\text{C}$ -NMR ( $\text{D}_2\text{O}$ )

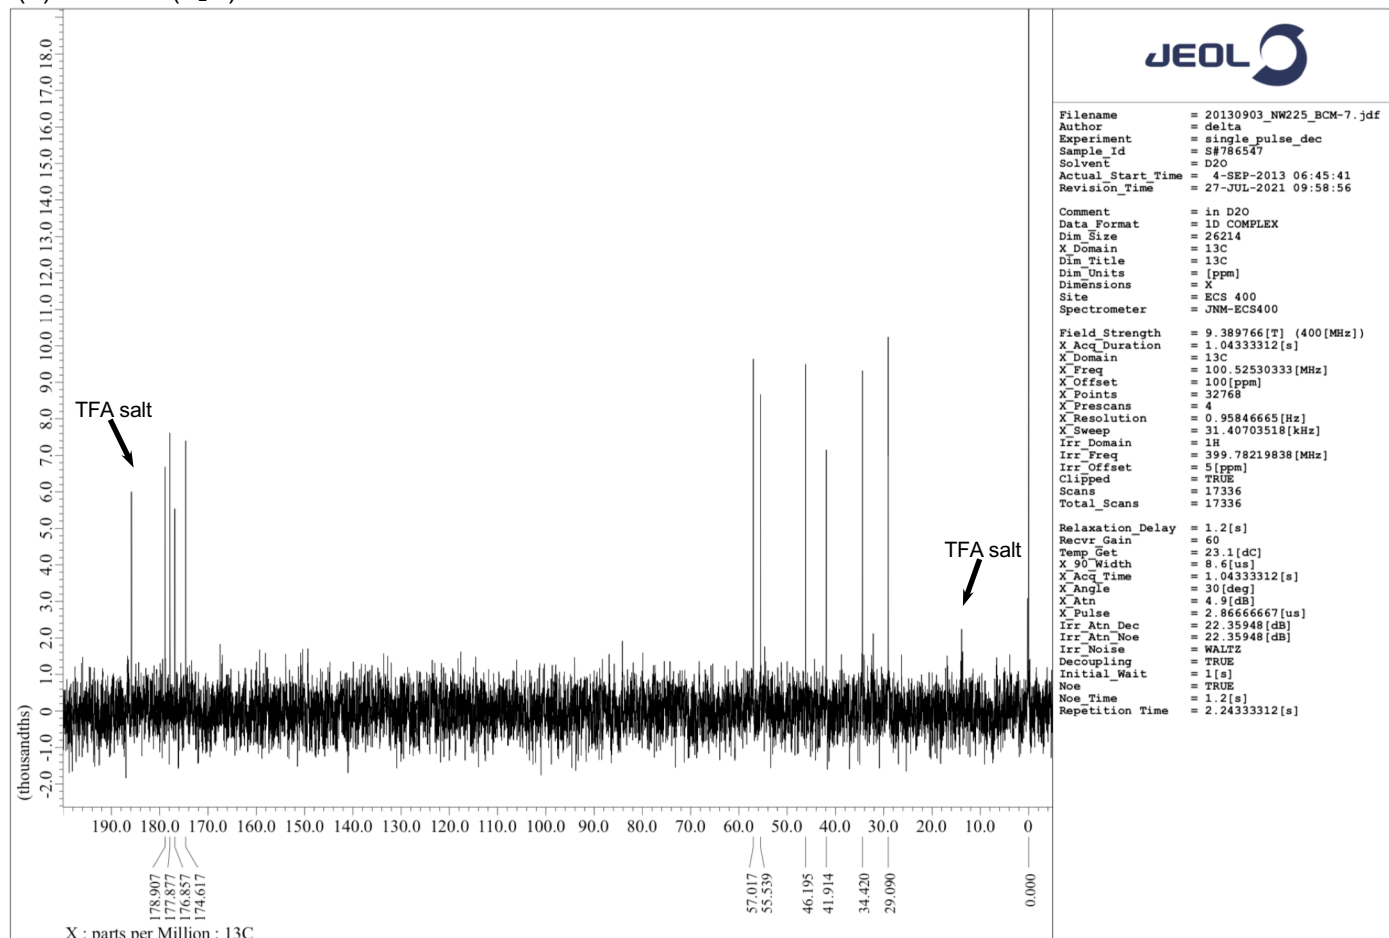

Fig. S1. (A)  $^1\text{H}$ - and (B)  $^{13}\text{C}$ -NMR spectra of glutathione trisulfide (GSSSG).

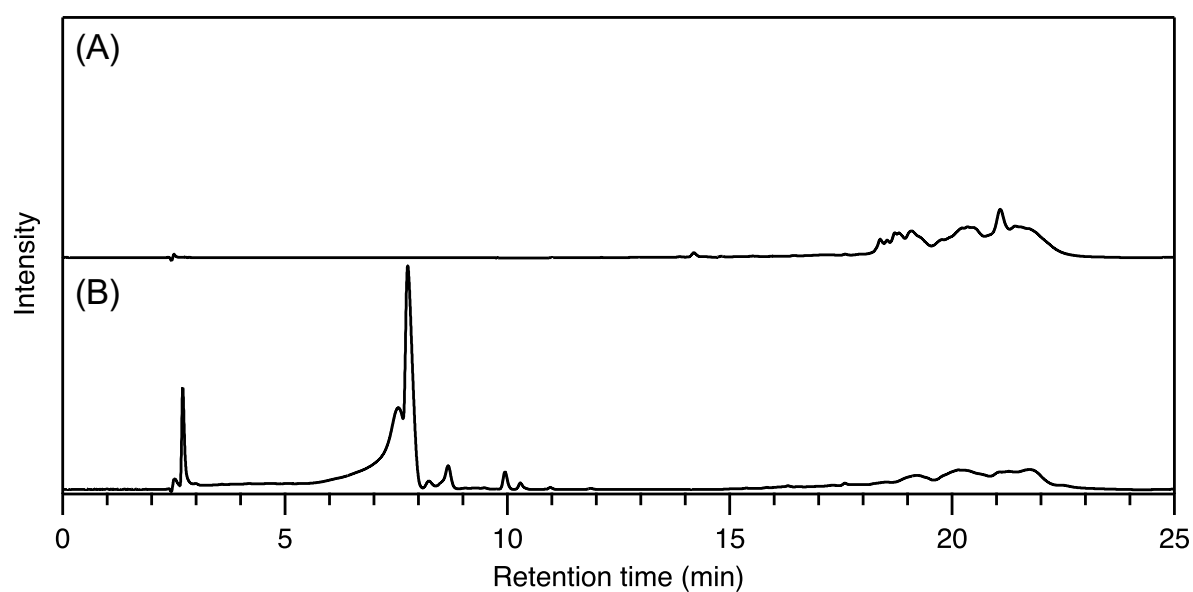

**Fig. S2** HPLC chromatograms of the reaction solutions containing (A) LA (5 mM) and (B) GSSG (25 mM) after UVL-irradiation.

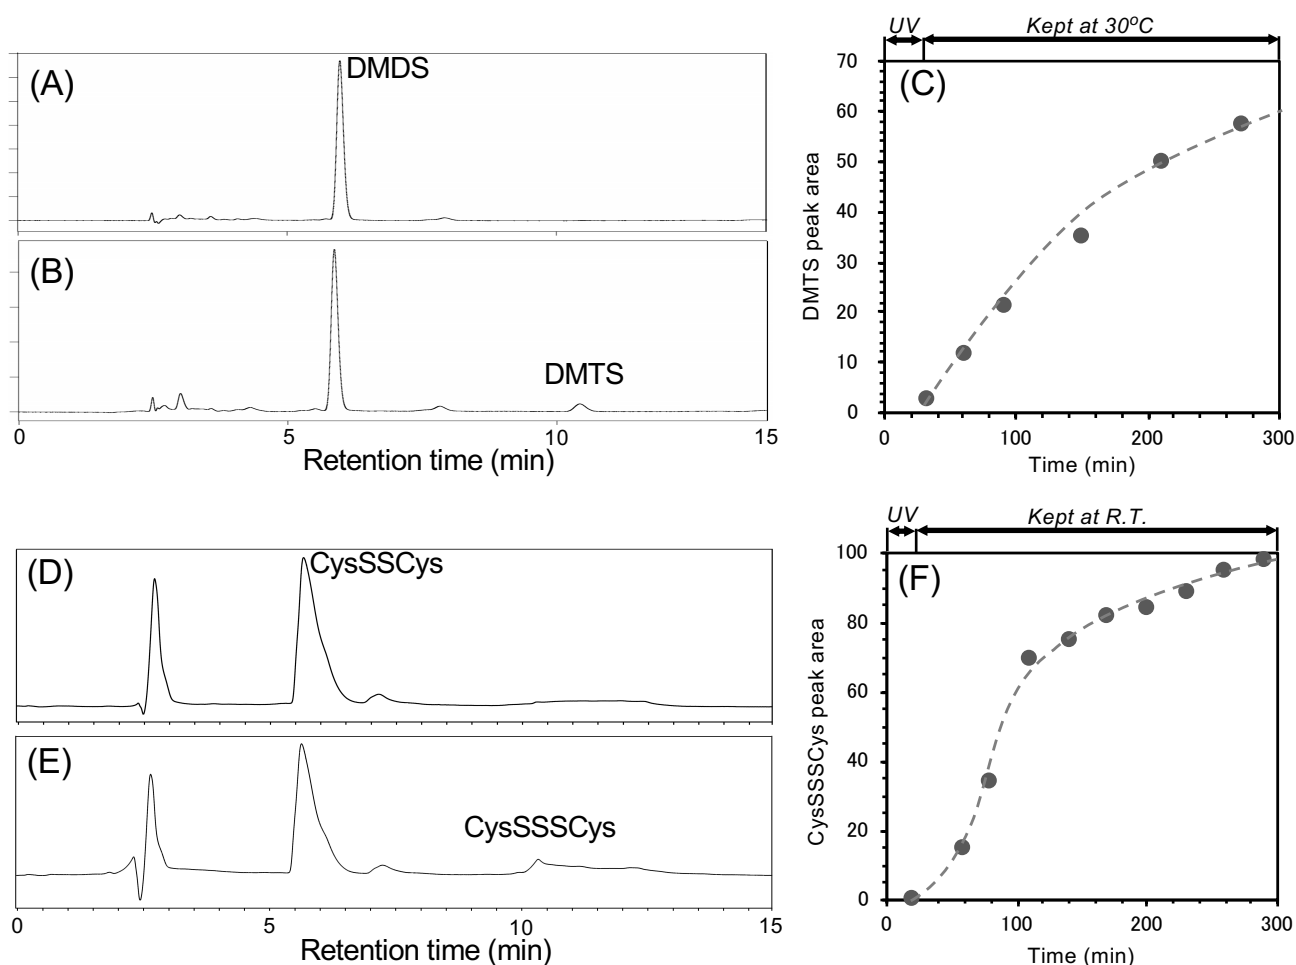

**Fig. S3** HPLC chromatograms of the reaction solutions containing LA (1 mM) and dimethyldisulfide (DMDS) (5 mM). (A) before and (B) after UVL-irradiation. (C) Time course for the amount of Dimethyltrisulfide (DMTS) at 37 °C after the UVL-irradiation. HPLC chromatograms of the reaction solutions containing LA (0.1 mM) and cystine (CysSSCys) (0.5 mM) (D) before and (E) after UVL-irradiation. (F) Time course for the peak area assignable to CysSSSCys at 37 °C after the UVL-irradiation.

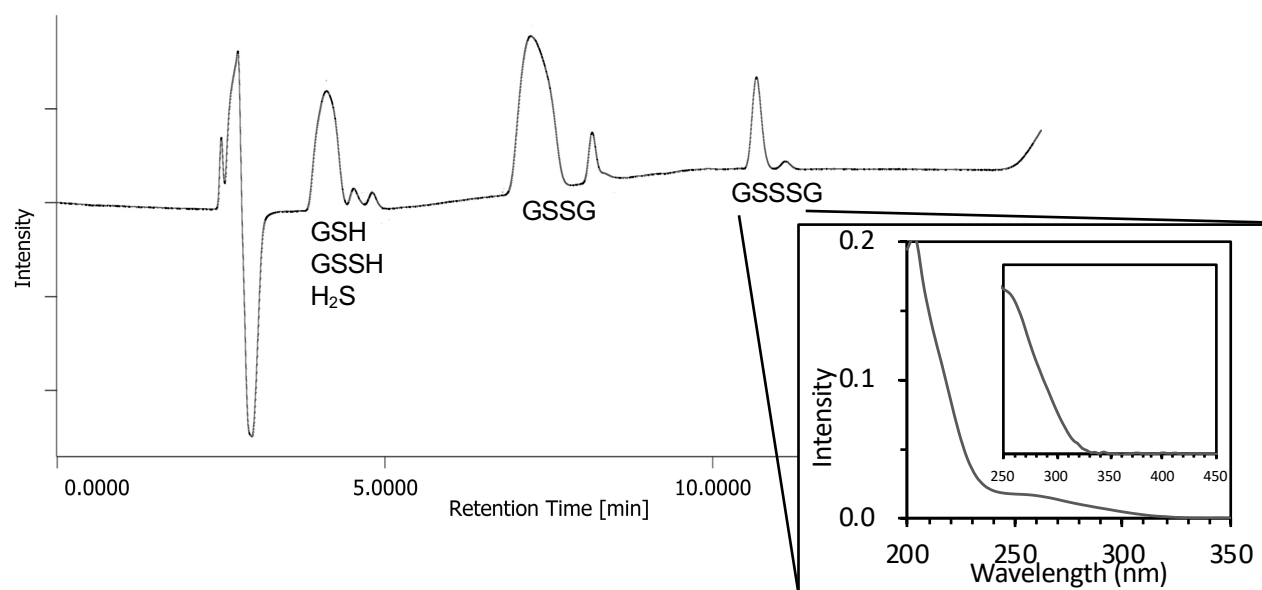

**Fig. S4.** HPLC profile for the reaction of GSSG with Na<sub>2</sub>S -Formation of GSSSG-.  
Eluent condition: H<sub>2</sub>O–MeOH gradient with 0.05v% TFA.

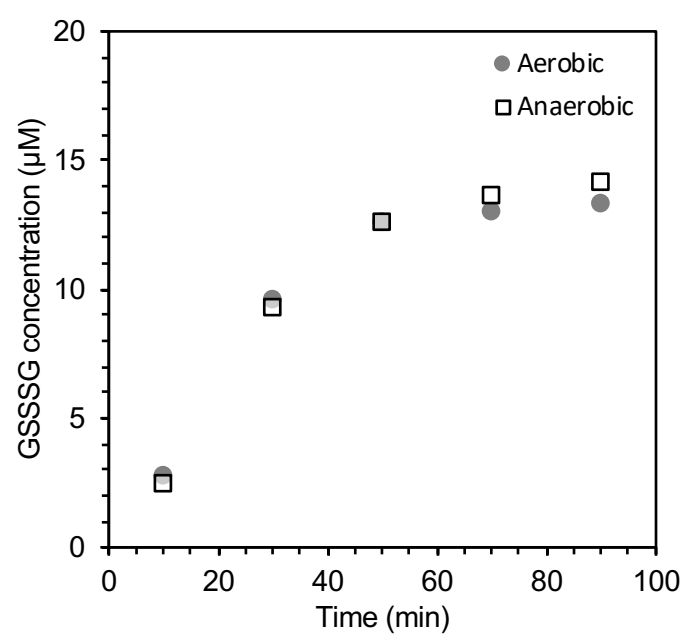

**Fig. S5.** Time dependence of GSSG formation in the aerobic and anaerobic conditions
